# Supplementary material for: A cooperative nano-CRISPR scaffold potentiates immunotherapy via activation of tumour-intrinsic pyroptosis
Source: PubMed Central journal article supplement (PMC9922300; doi:10.1038/s41467-023-36550-9), 2023-02-11
Supplement: 41467_2023_36550_MOESM1_ESM.pdf [file 41467_2023_36550_MOESM1_ESM.pdf]

## Supplementary Information for

### **A Cooperative Nano-CRISPR Scaffold Potentiates Immunotherapy via Activation of Tumour-intrinsic Pyroptosis**

Ning Wang <sup>1†</sup>, Chao Liu <sup>1†</sup>, Yingjie Li <sup>1</sup>, Dongxue Huang <sup>1</sup>, Xinyue Wu <sup>1</sup>, Xiaorong Kou <sup>1</sup>,  
Xiye Wang <sup>1</sup>, Qinjie Wu <sup>1\*</sup>, Changyang Gong <sup>1\*</sup>

<sup>1</sup> State Key Laboratory of Biotherapy and Cancer Center, West China Hospital, Sichuan University, Chengdu, 610041, P. R. China

† These authors contributed equally to this work

\* To whom correspondence should be addressed (C Gong, Q Wu). E-mail:  
[chygong14@163.com](mailto:chygong14@163.com), [cellwqj@163.com](mailto:cellwqj@163.com).

Supplementary Figures

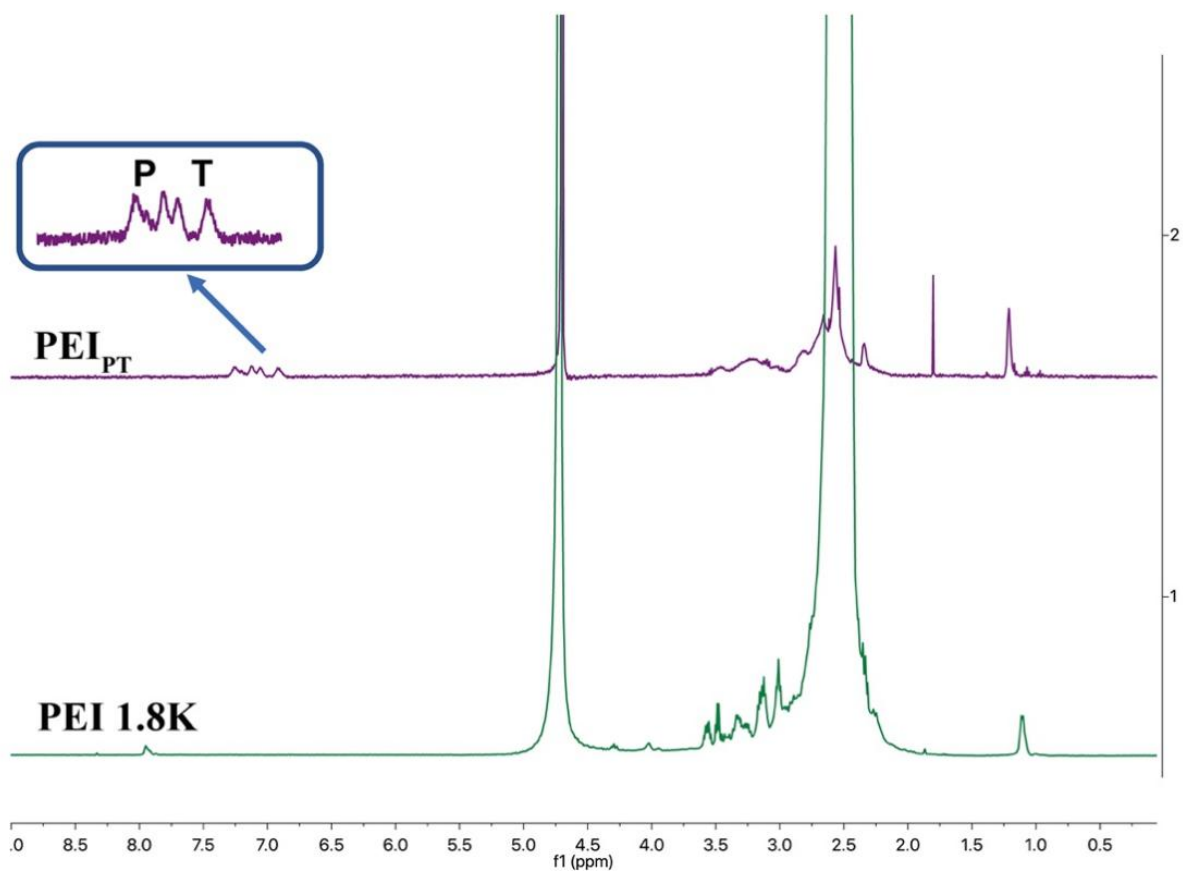

Supplementary Fig. 1.  $^1\text{H}$  NMR spectrum of  $\text{PEI}_{\text{PT}}$  in  $\text{D}_2\text{O}$ .

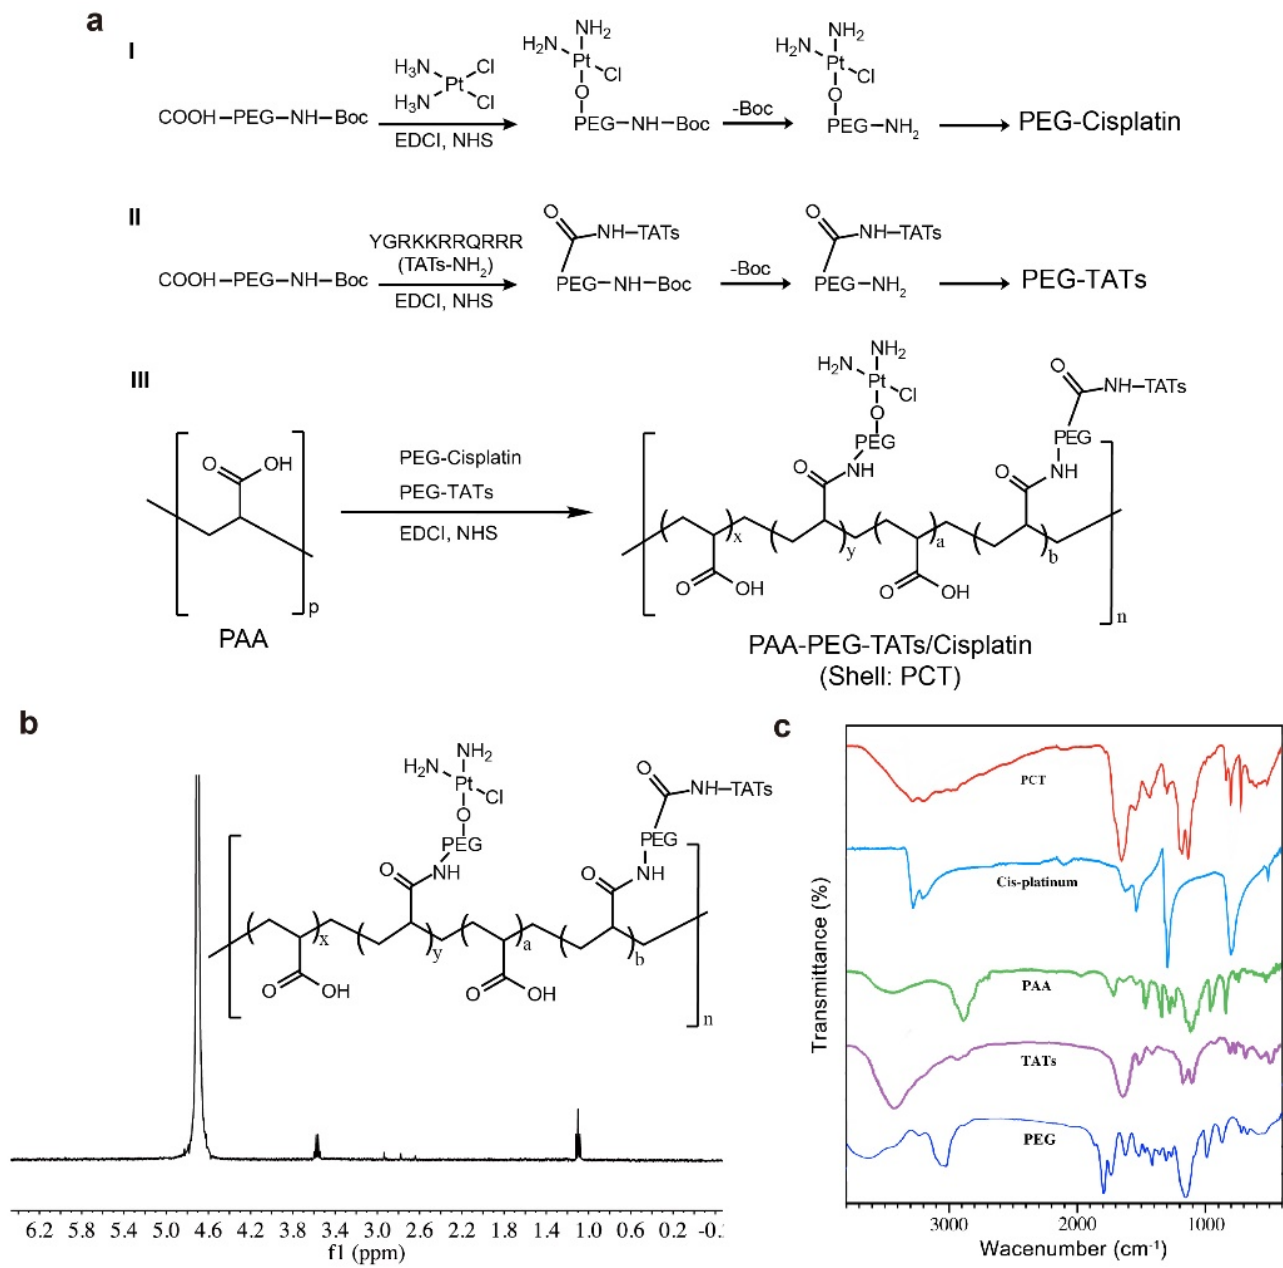

**Supplementary Fig. 2. Synthesis and characterization of PCT. a,** Synthesis routines of PCT. **b,** Spectrum of PCT in D<sub>2</sub>O. **c,** FT-IR of PCT.

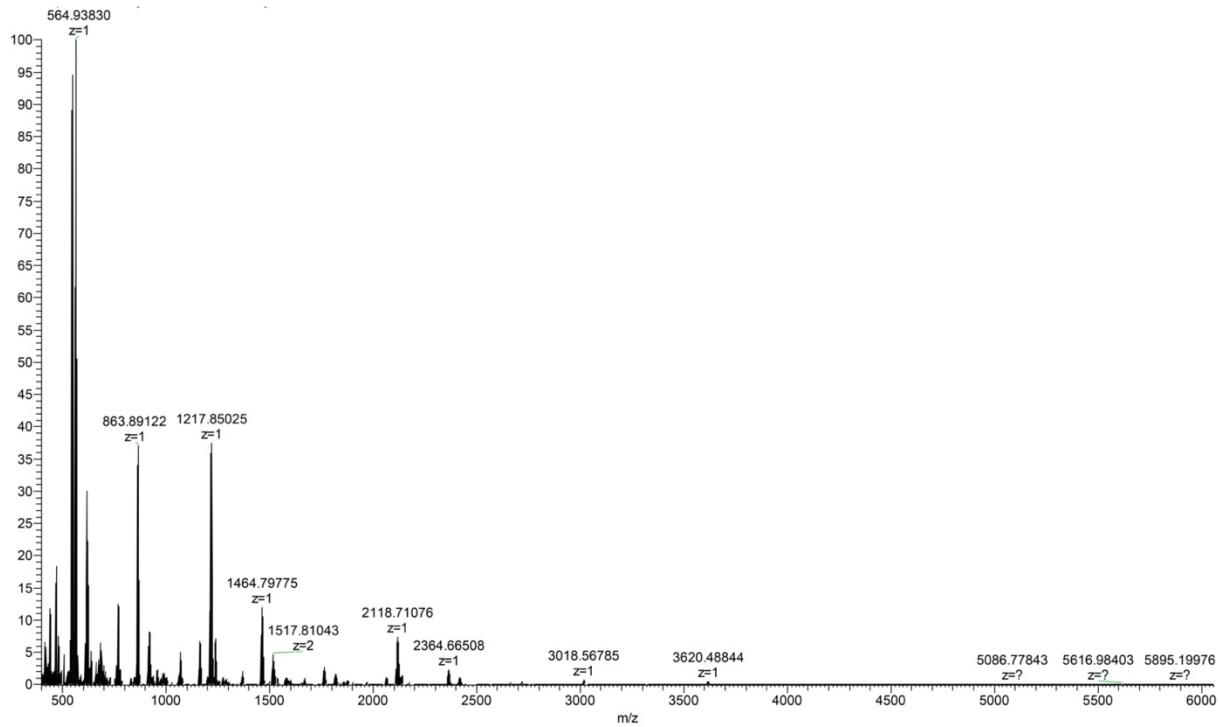

**Supplementary Fig. 3. Mass spectrum of PCT.**

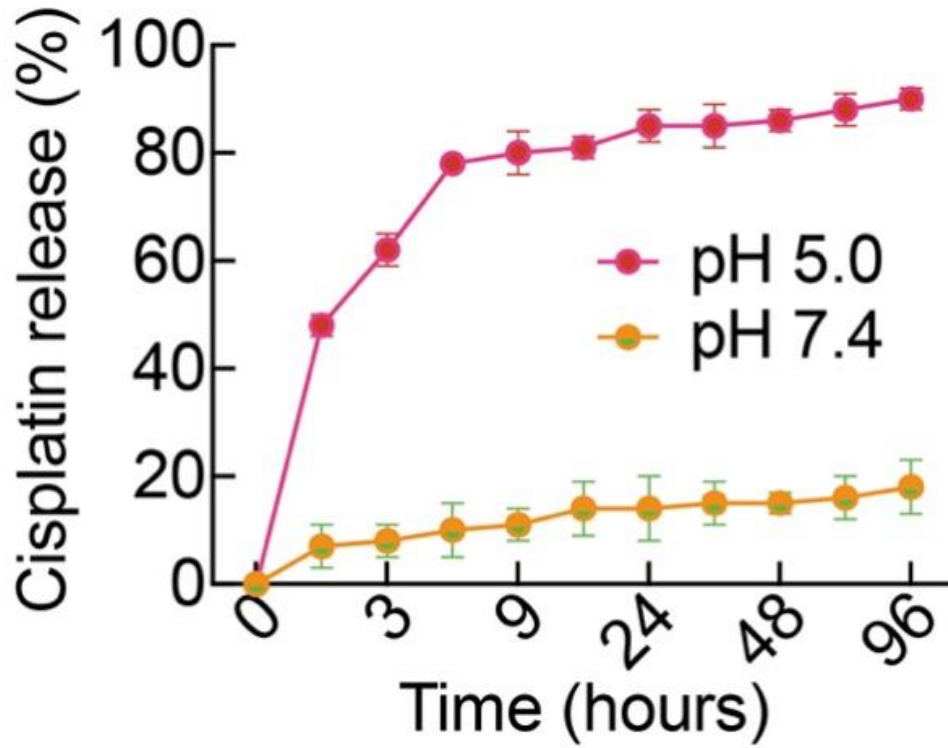

Supplementary Fig. 4. Cisplatin release behavior under pH 5.0 or pH 7.4 at different time points by HPLC. Data are presented as the mean  $\pm$  s.d. (n = 3 biological replicates per group).

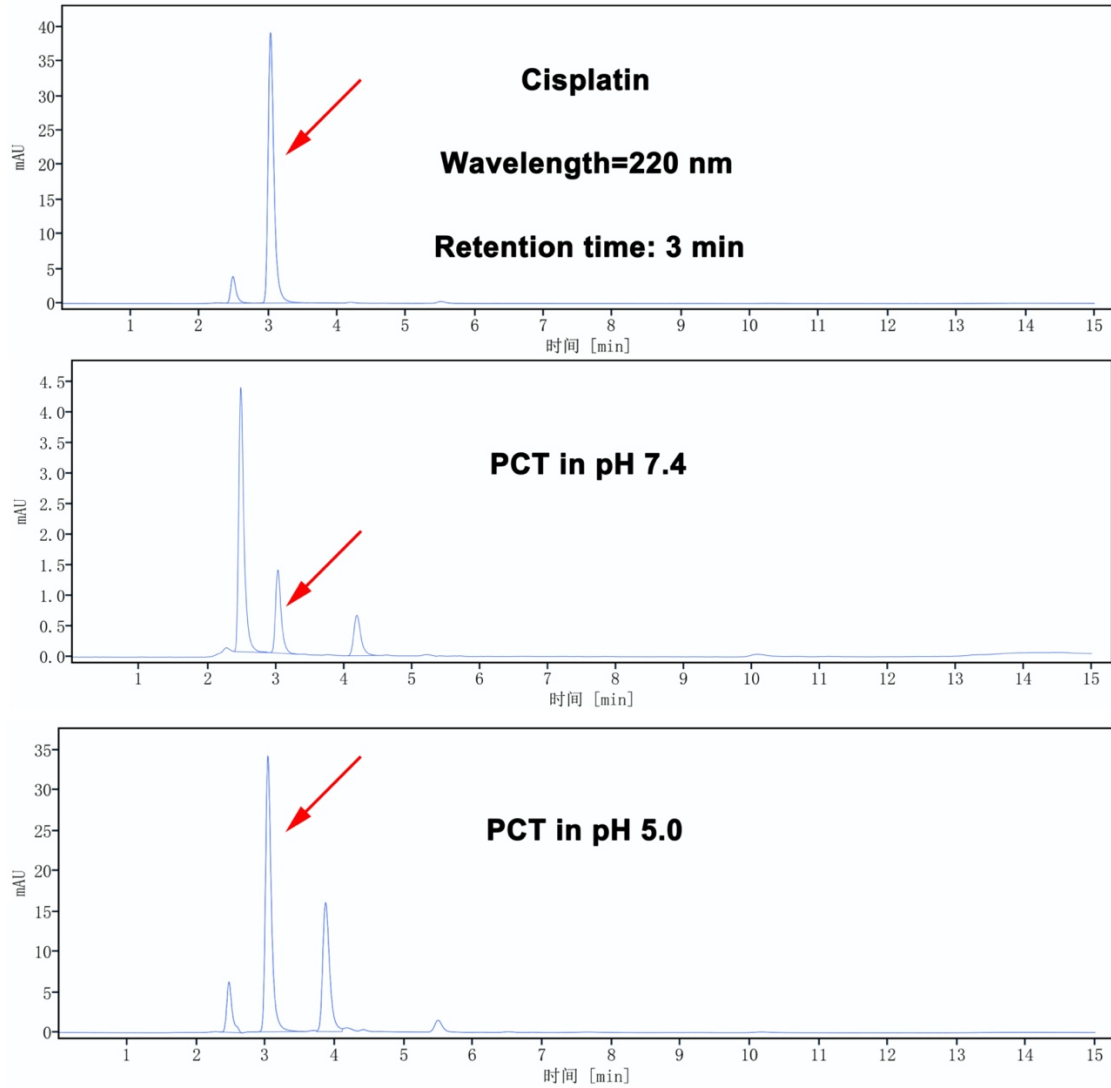

**Supplementary Fig. 5. HPLC spectrum of Cisplatin, PCT in pH 7.4 for 24 h or PCT in pH 5.0 for 24 h.**

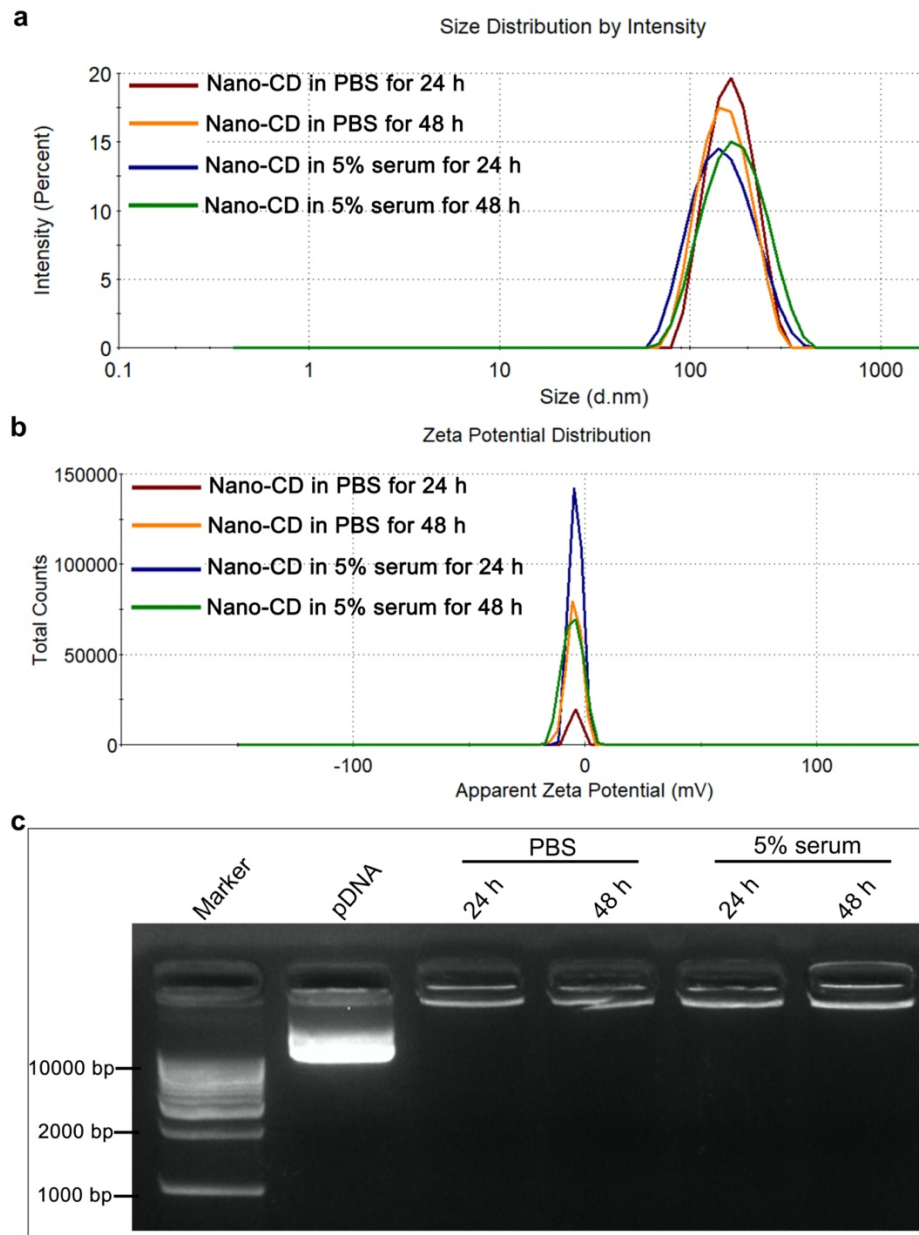

**Supplementary Fig. 6. The stability of Nano-CD in PBS or 5% serum for 24h or 48 h. a,b,** The particle size and zeta potential of Nano-CD in PBS or 5% serum for 24 h or 48 h. **c,** Agarose gel electrophoresis of Nano-CD in PBS or 5% serum for 24 h or 48 h (n =3).

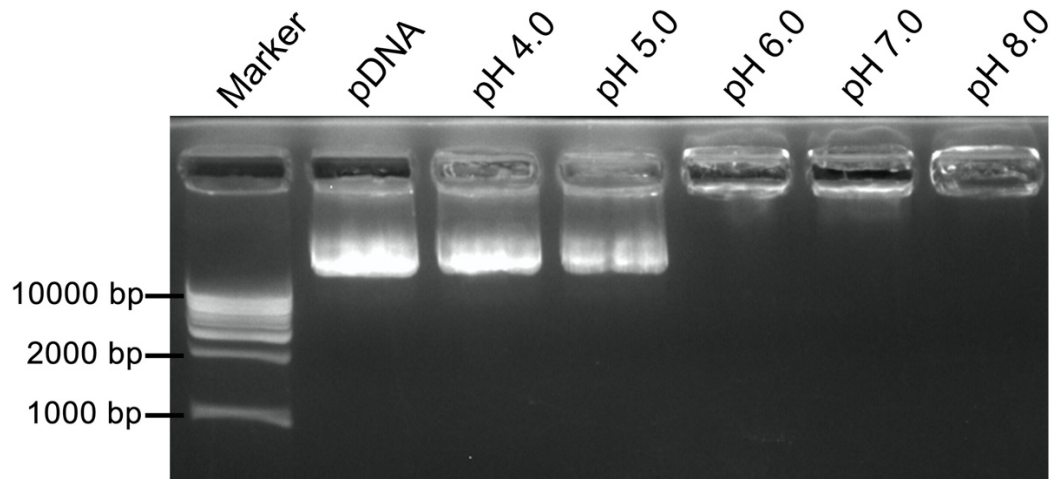

**Supplementary Fig. 7. Agarose gel electrophoresis of Nano-CD in different pH (pH 4.0-8.0) (n =3).**



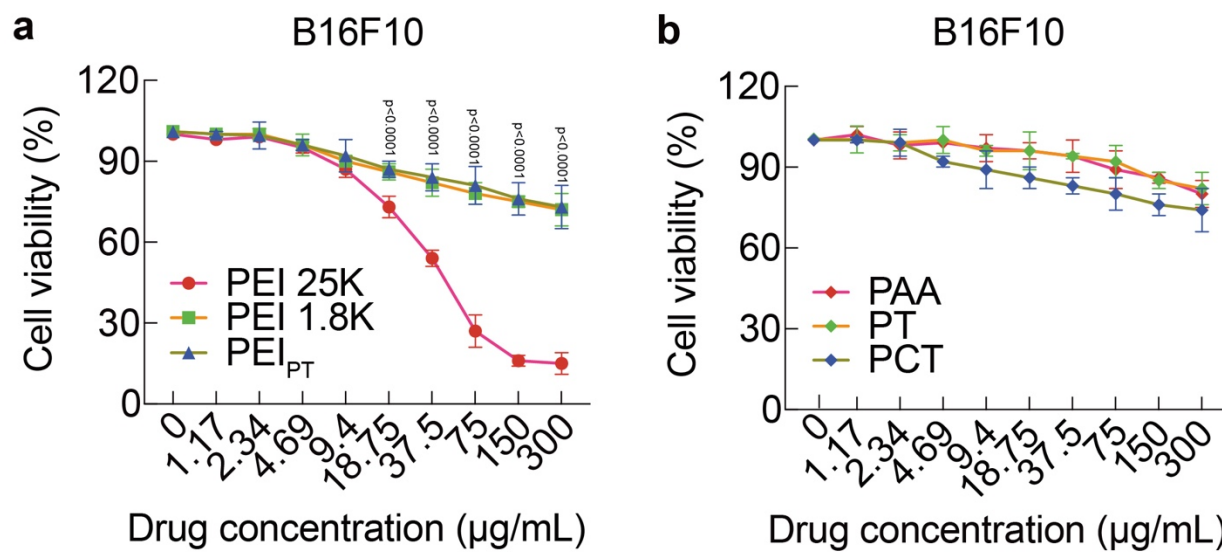

**Supplementary Fig. 8. MTT assay of different materials.** Data are presented as the mean  $\pm$  s.d. ( $n = 3$  biological replicates per group) and statistically analyzed using one-way ANOVA and Tukey's tests.

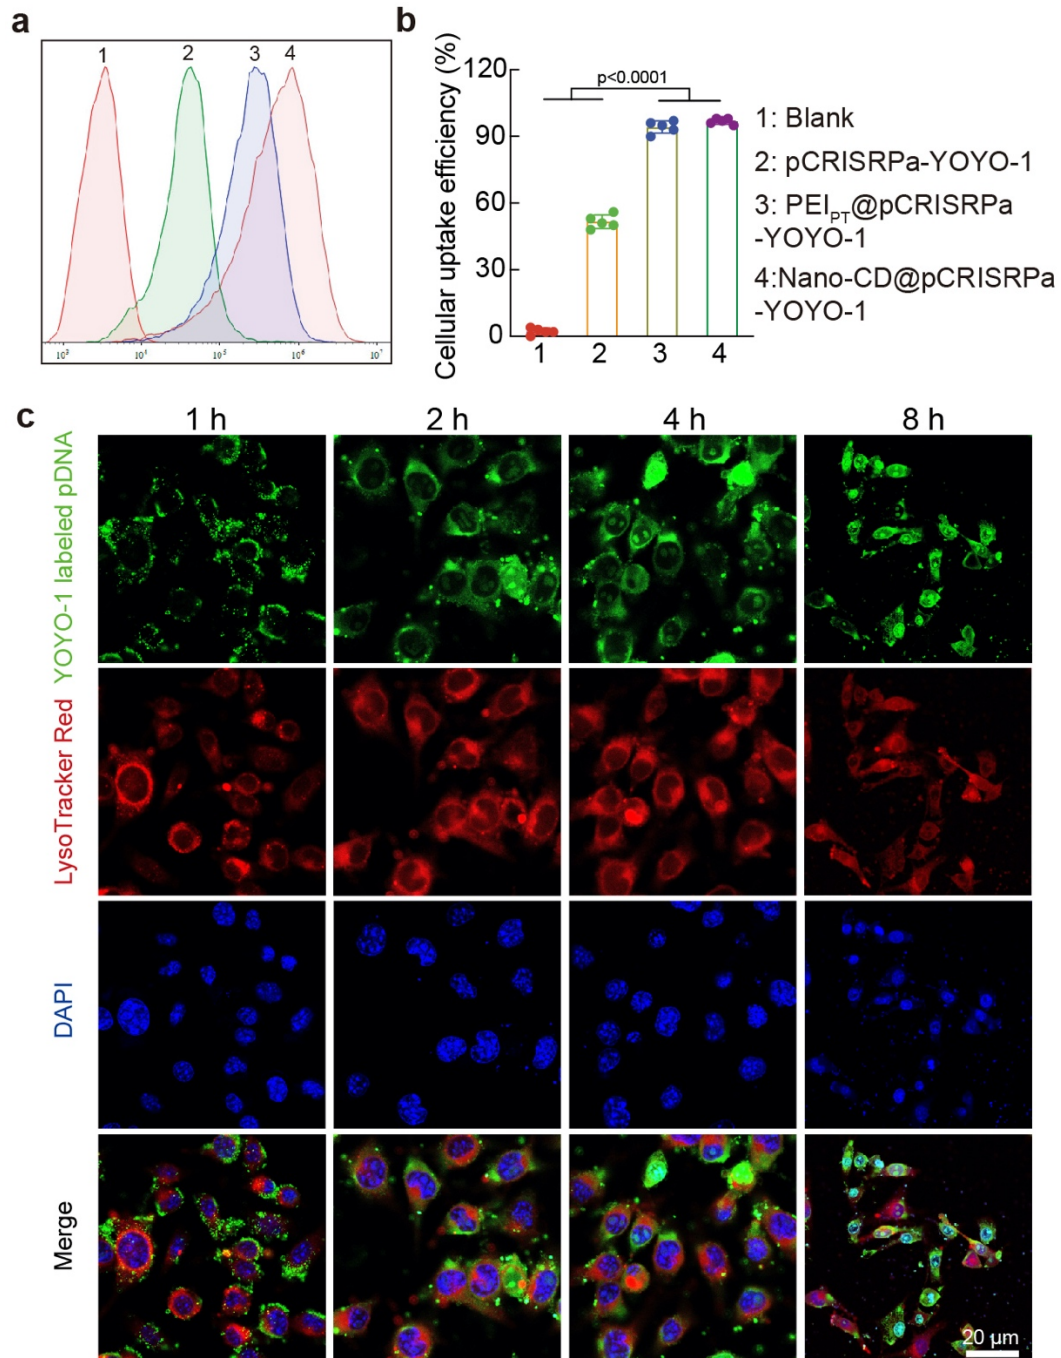

**Supplementary Fig. 9. Cell uptake analysis.** **a, b**, Representative cell uptake of different agents by FCM. Data are presented as the mean  $\pm$  s.d. ( $n = 5$  biological replicates per group) and statistically analyzed using one-way ANOVA and Tukey's tests. **c**, Intracellular tracking of Nano-CD in B16F10 cells. Endosomes and lysosomes were stained with LysoTracker Red (red), plasmids were labeled with YOYO-1 (green), and nuclei were stained with Hoechst 33342 (blue). ( $n = 3$ . Scale bar: 20  $\mu$ m).

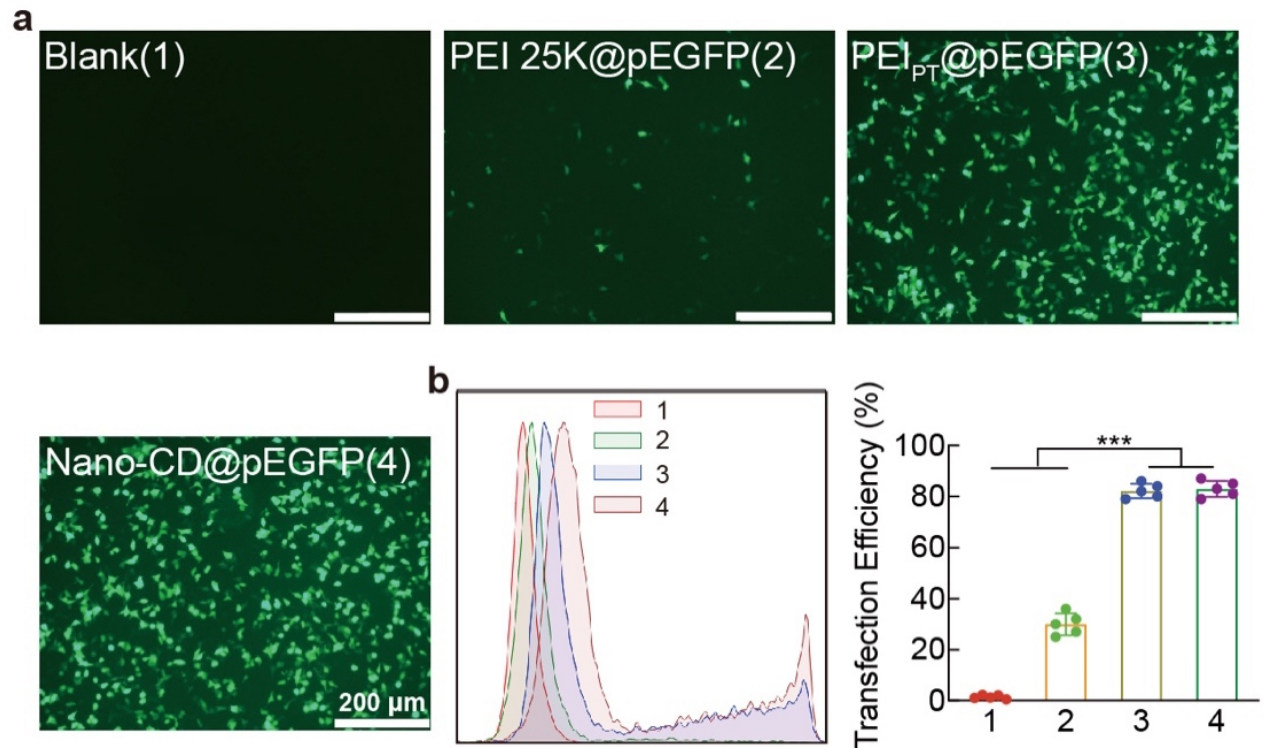

**Supplementary Fig. 10. Transfection efficiency analysis.** Representative images of GFP<sup>+</sup> B16F10 cells (green) by fluorescence microscope (Scale bar: 200  $\mu$ m) and quantitative analysis of transfection efficiency by FCM. Data are presented as the mean  $\pm$  s.d. (n = 5 biological replicates per group) and statistically analyzed using one-way ANOVA and Tukey's tests.

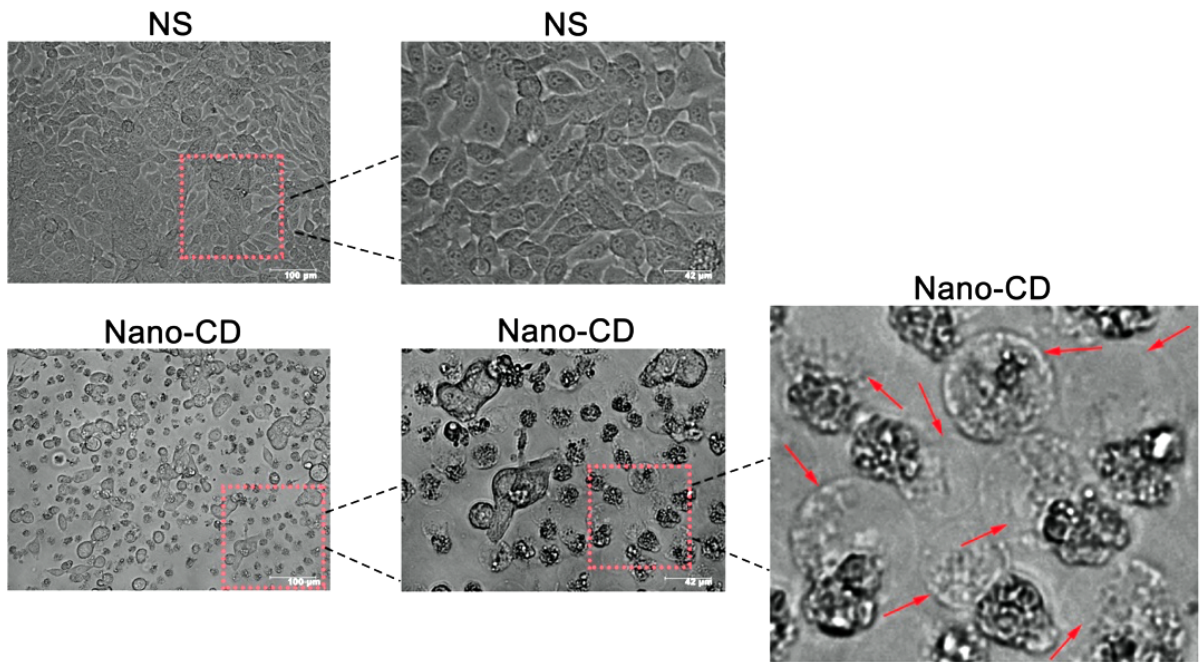

**Supplementary Fig. 11** The morphological images of pyroptosis by CLSM. (n = 3. Scale bar: 42 μm).

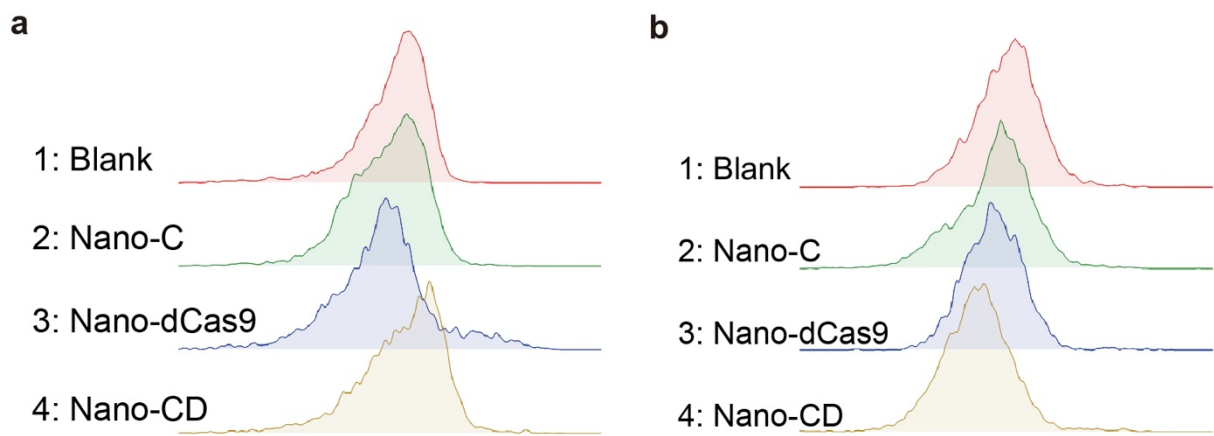

**Supplementary Fig. 12. Detection of endogenous adjuvant effectors. a**, CRT expression tested by FCM (n = 4). **b**, The HMGB1 expression analyzed by FCM (n = 4).



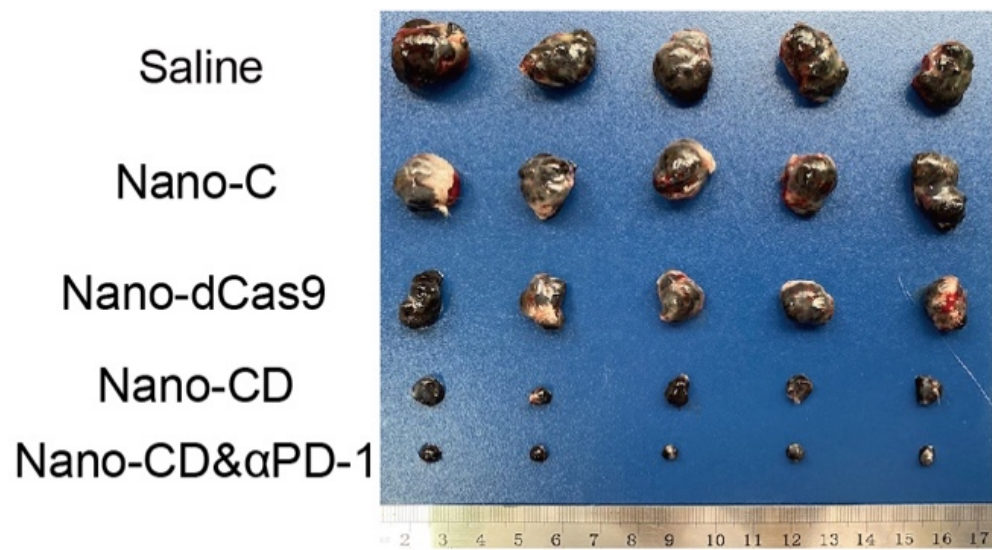

**Supplementary Fig. 13. Representative pictures of B16F10 tumors after 24 days therapy.**

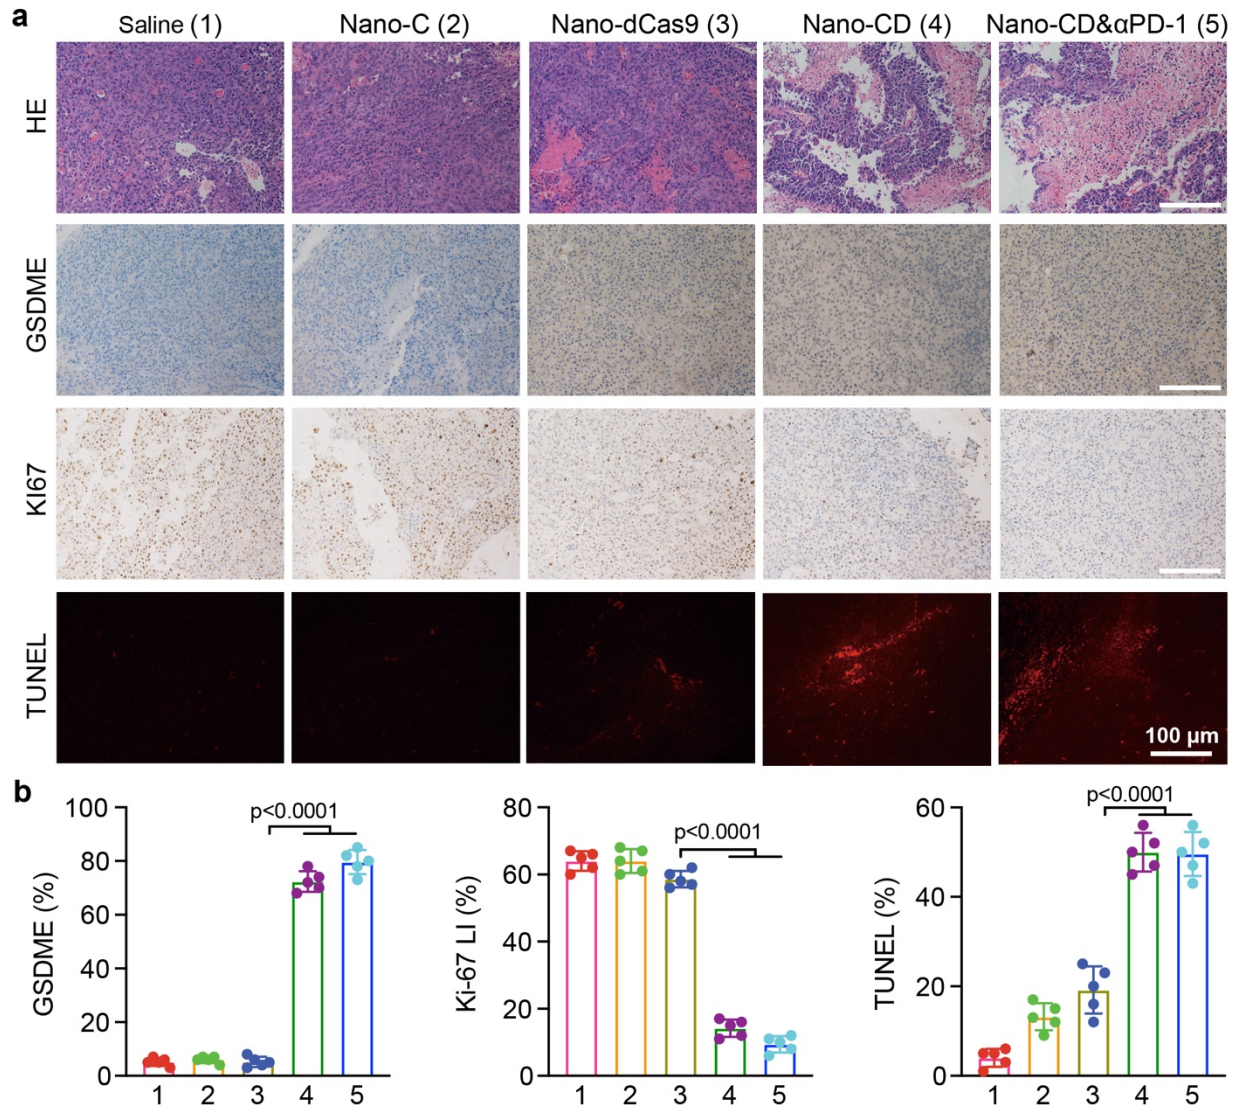

**Supplementary Fig. 14. H&E staining and IHC analysis.** **a**, Images of tumor sections stained with HE, GSDME (brown), Ki67 (brown) and TUNEL (red) by fluorescence microscope (Scale bar: 100  $\mu$ m). **b**, Quantitative analysis of GSDME expression, Ki67 LI and apoptosis index of per group. Data are presented as the mean  $\pm$  s.d. ( $n = 5$  biological replicates per group) and statistically analyzed using one-way ANOVA and Tukey's tests.

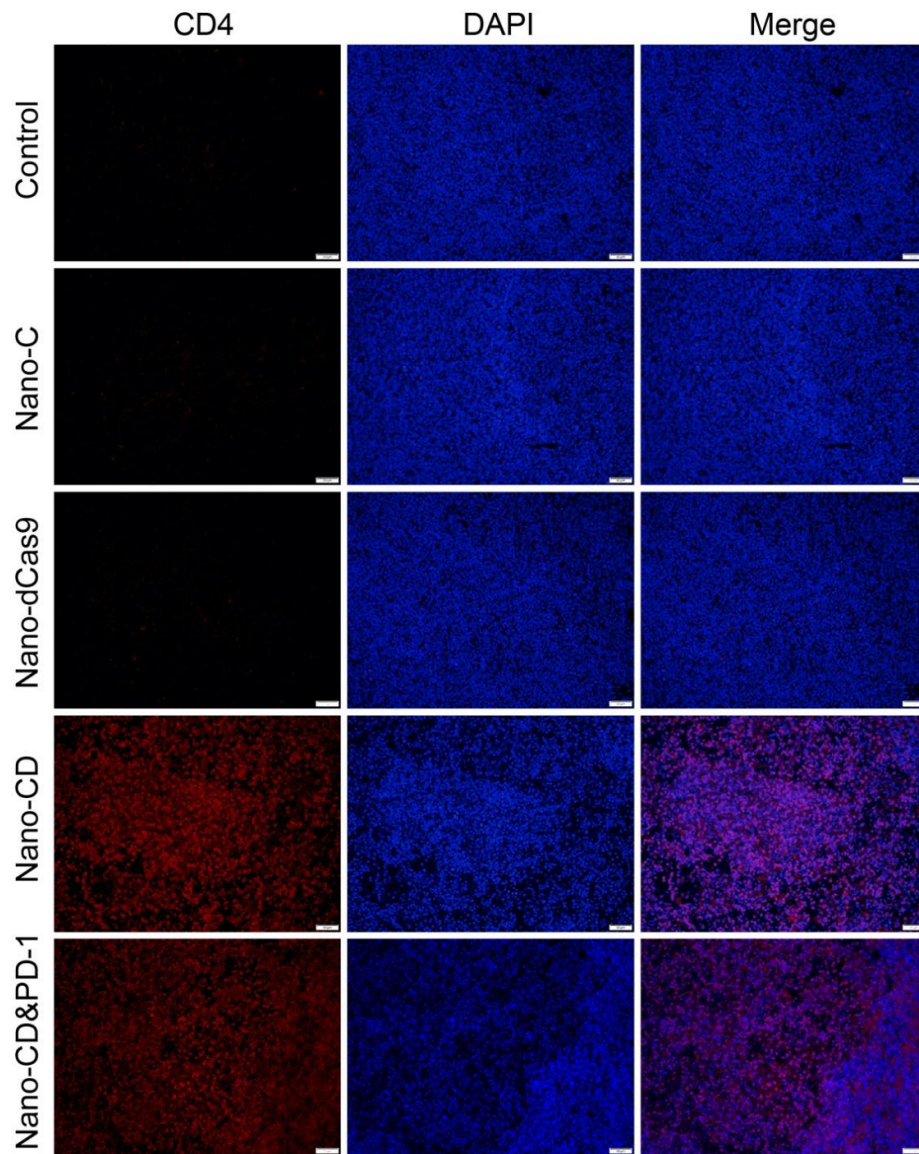

**Supplementary Fig. 15. Immunofluorescence staining of CD4<sup>+</sup> T cells.** CD4<sup>+</sup> T cells (red); nucleus (blue). (n = 3. Scale bar: 50  $\mu$ m).



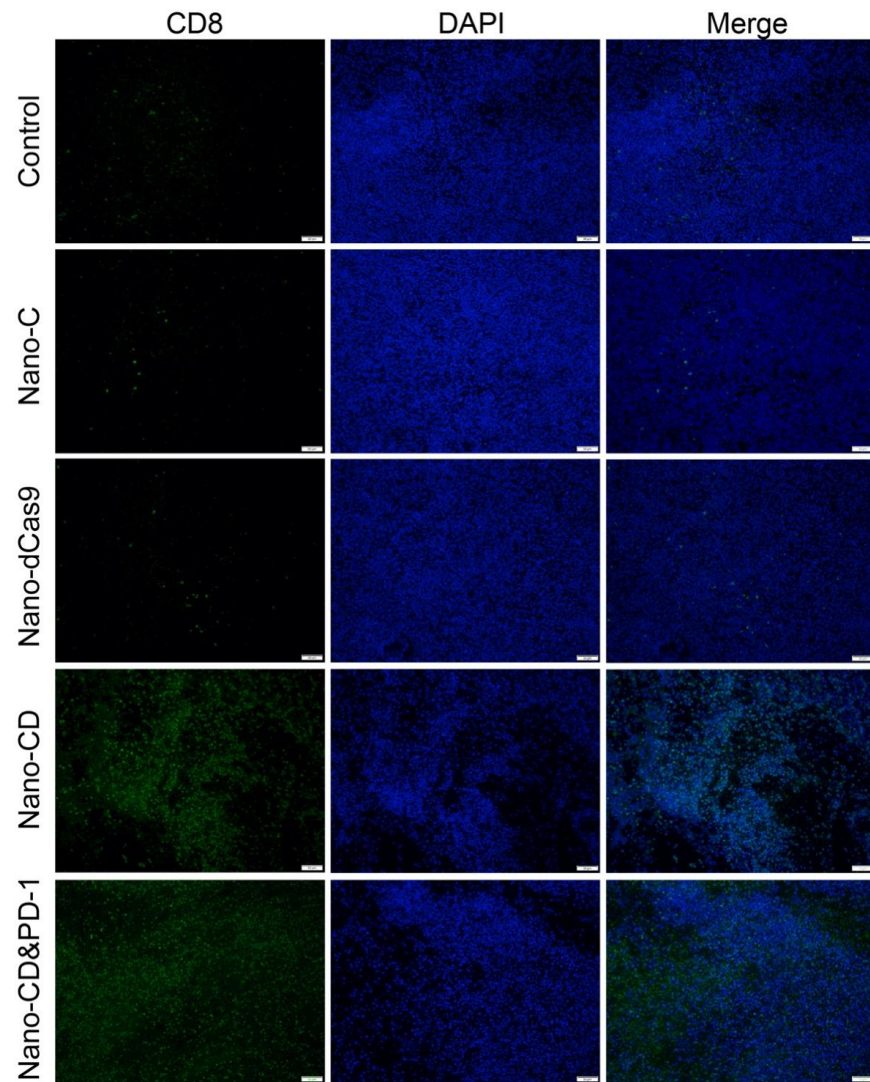

**Supplementary Fig. 16. Immunofluorescence staining of CD8<sup>+</sup> T cells.** CD8<sup>+</sup> T cells (green); nucleus (blue). (n = 3. Scale bar: 50  $\mu$ m).

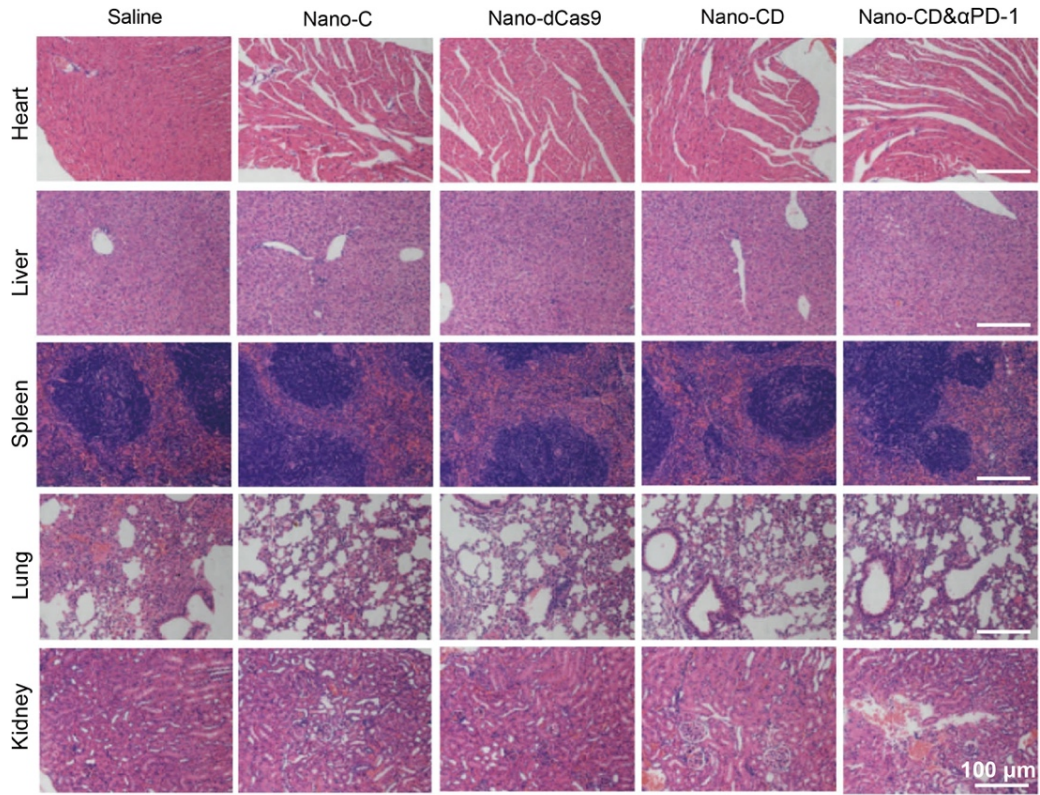

**Supplementary Fig. 17. Evaluation of side-effect of Nano-CD in major organs of mice after different treatment. (n = 3. Scale bar: 100 μm).**

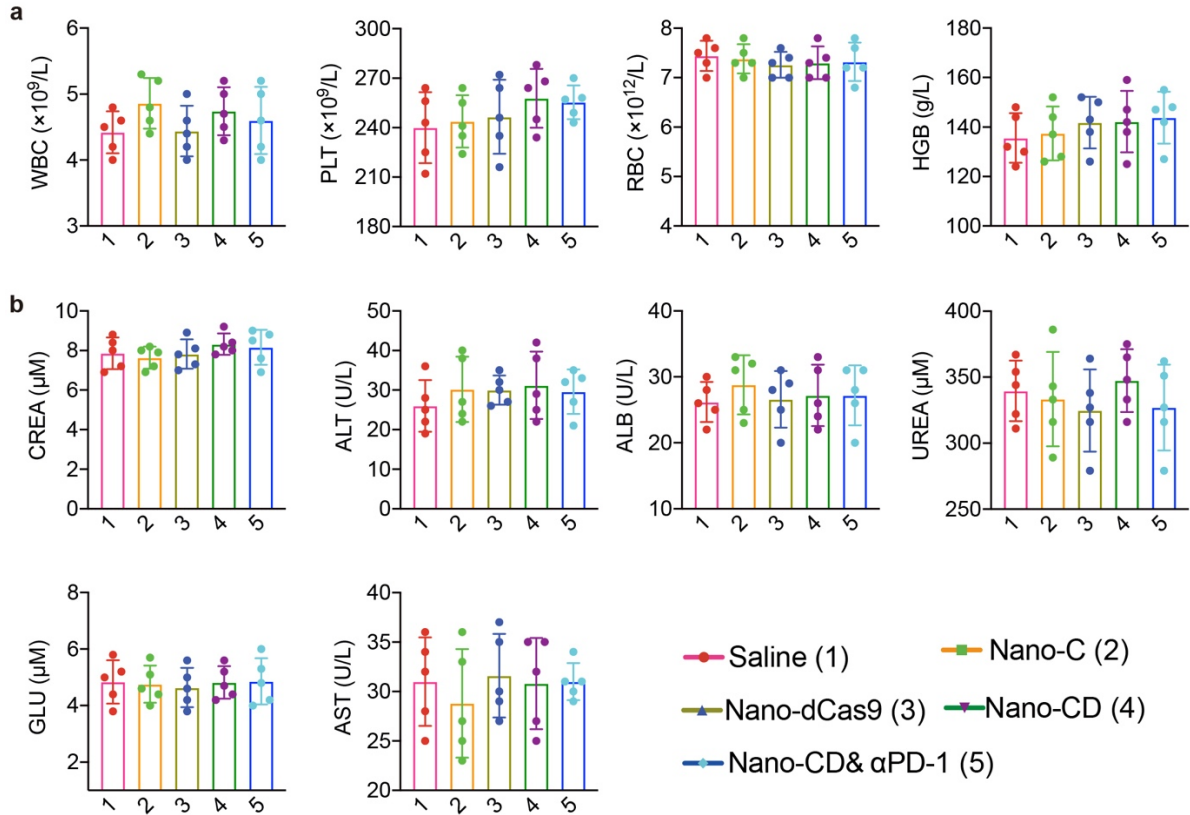

**Supplementary Fig. 18. CBC test (a) and blood chemistry profile analysis (b) after treatment with different agents. Data are presented as the mean  $\pm$  s.d. (n = 5 biological replicates per group)**

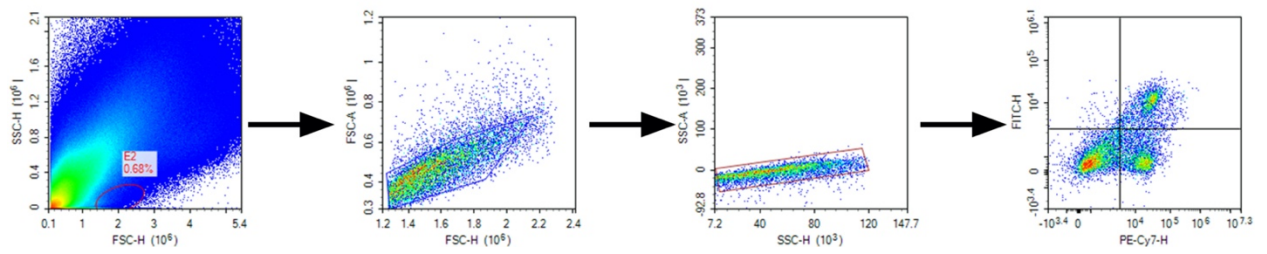

**Supplementary Fig. 19. Representative scatter plots and gating information derived from analysis of CD4<sup>+</sup> T cells in tumor tissue.**

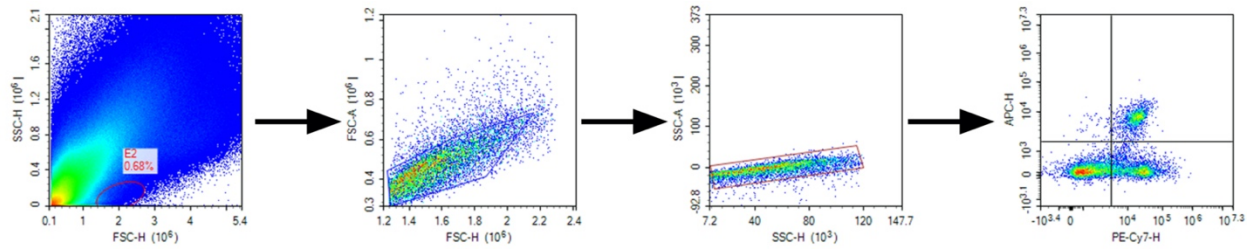

**Supplementary Fig. 20. Representative scatter plots and gating information derived from analysis of CD8<sup>+</sup> T cells in tumor tissue.**

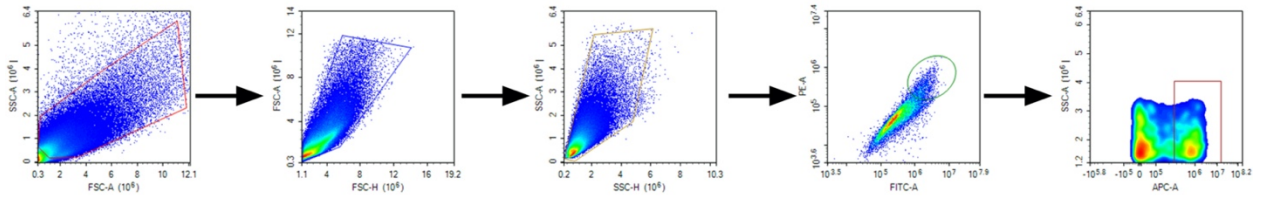

**Supplementary Fig. 21. Representative scatter plots and gating information derived from analysis of CD206<sup>+</sup> macrophages in tumor tissue.**



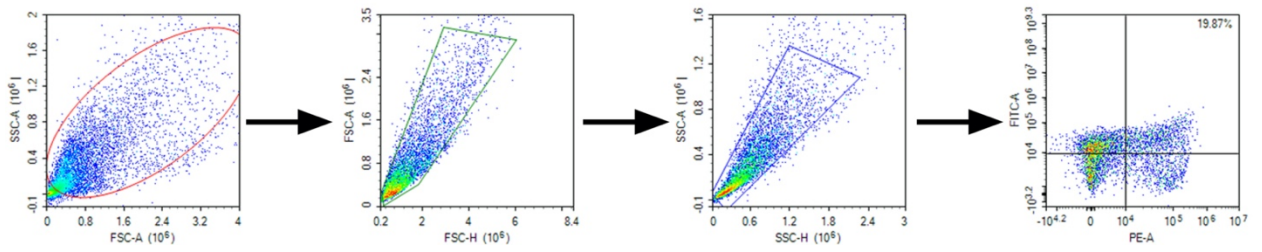

**Supplementary Fig. 22. Representative scatter plots and gating information derived from analysis of T<sub>EM</sub> cells in tumor tissue.**

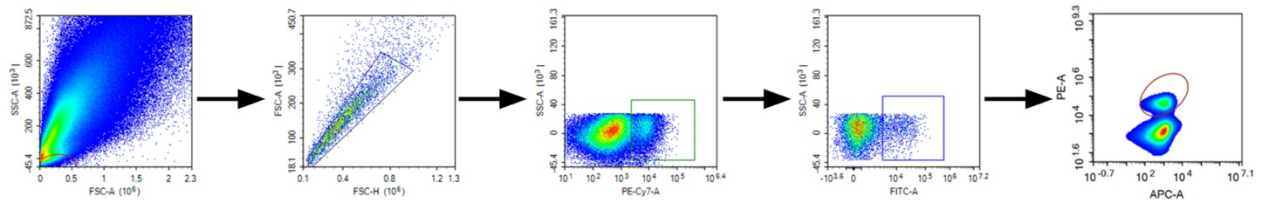

**Supplementary Fig. 23. Representative scatter plots and gating information derived from analysis of T<sub>EM</sub> cells in tumor tissue.**



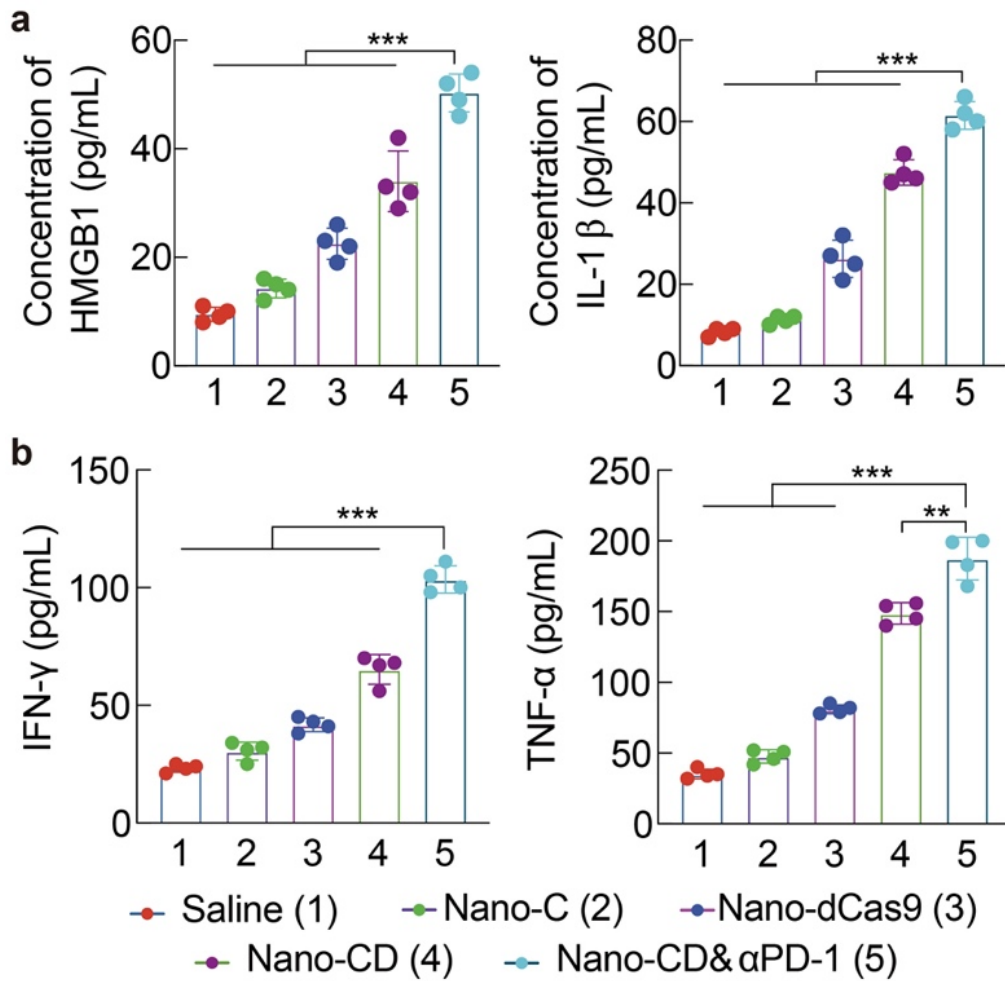

**Supplementary Fig. 24. HMGB1 and cytokine concentrations in serum. a**, The HMGB1 and IL-1 $\beta$  in serum by ELISA per group. **b**, Level of IFN- $\gamma$  and TNF- $\alpha$  cytokines in serum per group. In panels **a** and **b**, data are presented as the mean  $\pm$  s.d. (n = 4 biological replicates per group) and statistically analyzed using one-way ANOVA and Tukey's tests.

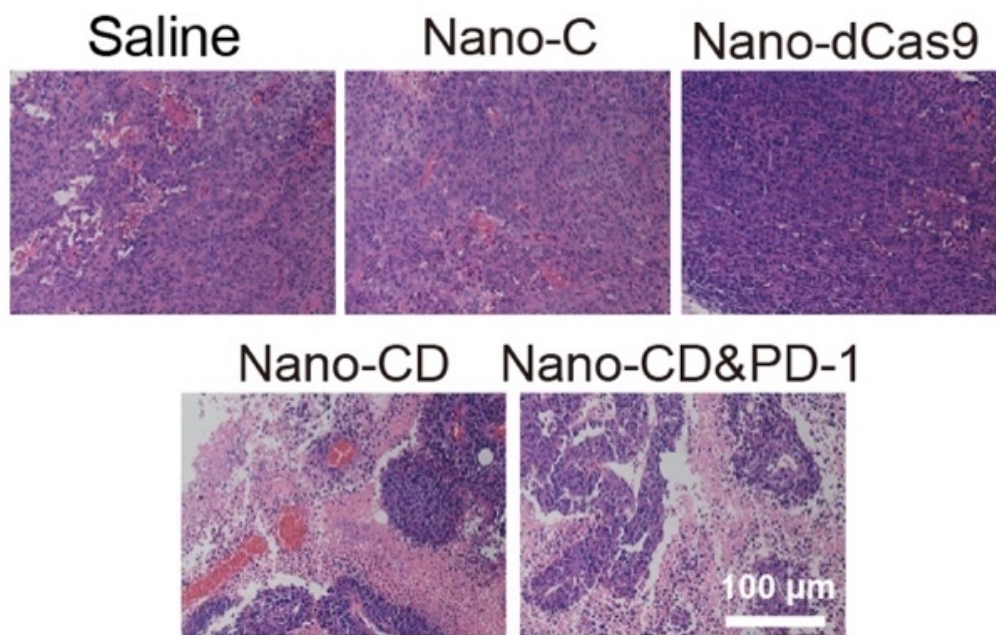

**Supplementary Fig. 25. The H&E staining of tumor sections.** (n = 3. Scale bar: 100 μm).

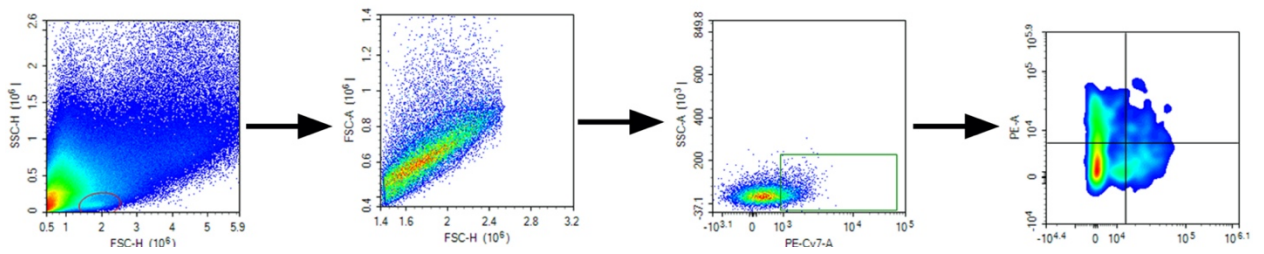

**Supplementary Fig. 26. Representative scatter plots and gating information derived from analysis of CD69<sup>+</sup> T cells in tumor tissue.**

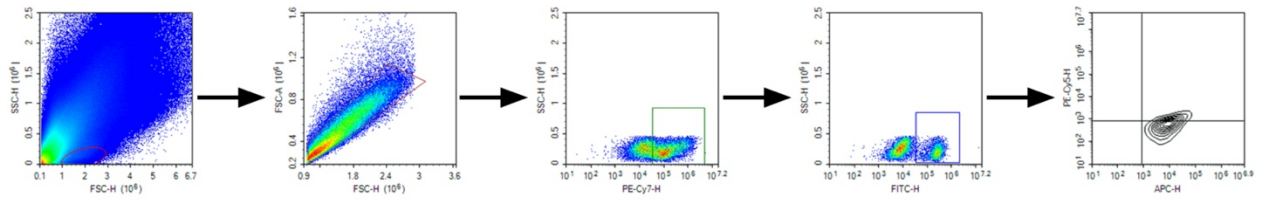

**Supplementary Fig. 27. Representative scatter plots and gating information derived from analysis of Treg in tumor tissue.**

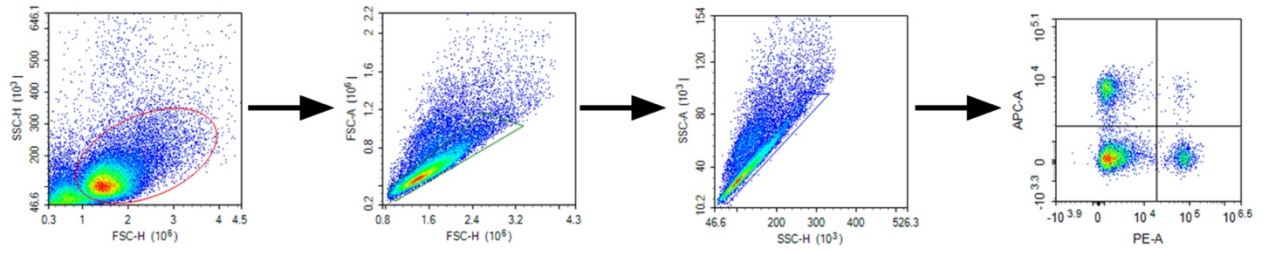

**Supplementary Fig. 28. Representative scatter plots and gating information derived from analysis of CD4<sup>+</sup> and CD8<sup>+</sup> T cells in spleens.**

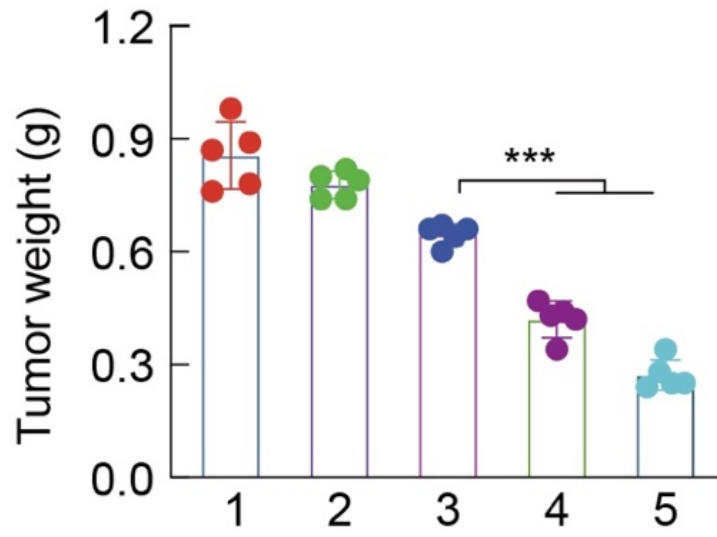

**Supplementary Fig. 29. Profile of lung weight in each group.** Data are presented as the mean  $\pm$  s.d. (n = 5 biological replicates per group) and statistically analyzed using one-way ANOVA and Tukey's tests. (1: Saline, 2: Nano-C, 3: Nano-dCas9, 4: Nano-CD, 5: Nano-CD& $\alpha$ PD-1).

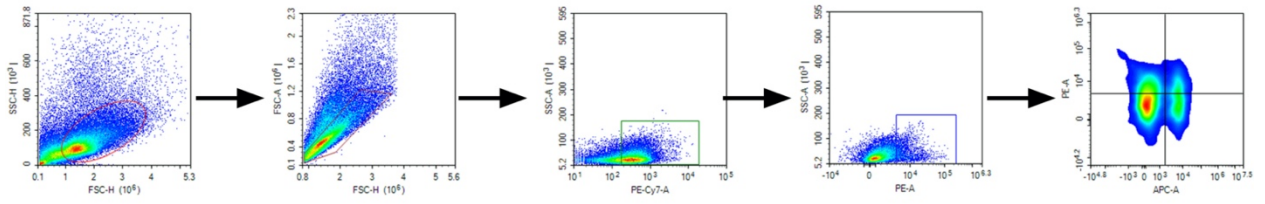

**Supplementary Fig. 30. Representative scatter plots and gating information derived from analysis of CD69<sup>+</sup> T cells in spleens.**

**Supplementary. Table 1. Modification efficiency of amino acid on PEI<sub>PTn</sub>**

| <b>Polymer</b>            | <b>Number of<br/>Phe + Tyr</b> | <b>X</b> | <b>Y</b> |
|---------------------------|--------------------------------|----------|----------|
| <b>PEI<sub>PT2</sub></b>  | 1 + 1                          | 0.2      | 1.25%    |
| <b>PEI<sub>PT4</sub></b>  | 2 + 2                          | 0.9      | 5.62%    |
| <b>PEI<sub>PT8</sub></b>  | 4 + 4                          | 2.3      | 14.34%   |
| <b>PEI<sub>PT16</sub></b> | 8 + 8                          | 3.6      | 22.50%   |
| <b>PEI<sub>PT20</sub></b> | 10 + 10                        | 5.5      | 34.38%   |
| <b>PEI<sub>PT24</sub></b> | 12 + 12                        | 5.7      | 35.63%   |

X is the average number of Phe and Tyr on each PEI 1.8K molecular.

Y is the percentage of amino groups on prepared PEI<sub>PTn</sub>.
